# Supplementary material for: Metallic Ti3O5 hierarchical porous microspheres with an enhanced photothermal property
Source: Royal Society of Chemistry journal article supplement (doi:10.1039/c9ra09147e), 2020-01-01
Supplement: c9ra09147e1.pdf [file c9ra09147e1.pdf]

Supporting Information

**Metallic Ti<sub>3</sub>O<sub>5</sub> Hierarchical Porous Microspheres with Enhanced Photothermal Property**

*Ruifeng Du,<sup>a,b</sup> Wei Liu,<sup>b</sup> Hua Bai,<sup>b</sup> Hongtao Wang,<sup>a\*</sup> and Guangcheng Xi<sup>b\*</sup>*

<sup>a</sup>School of Chemical and Material Engineering, Fuyang Normal University, Fuyang 236037, China

Email: hwang@fynu.edu.cn

<sup>b</sup>Institute of Industrial and Consumer Product Safety, Institution Chinese Academy of Inspection and Quarantine, No. 11, Ronghua South Road, Beijing 100176, P. R. China.

E-mail: xiguangcheng@caiq.org.cn

## 1. Calculation of Photothermal Conversion Efficiency of $\gamma$ -Ti<sub>3</sub>O<sub>5</sub> HPMs

According to the Beer-Lambert Law, the mass extinction coefficient  $\alpha$  of the  $\gamma$ -Ti<sub>3</sub>O<sub>5</sub> HPMs can be calculated using equation (1):

$$A = \alpha LC \quad (1)$$

In equation (1), A refers to the absorbance of  $\gamma$ -Ti<sub>3</sub>O<sub>5</sub> HPMs at 808 nm,  $\alpha$  is the mass extinction coefficient of  $\gamma$ -Ti<sub>3</sub>O<sub>5</sub> (L g<sup>-1</sup> cm<sup>-1</sup>), L is the optical length of the quartz cuvette (cm), and C is the mass concentration (g L<sup>-1</sup>). According to Figure S5, the calculated mass extinction coefficient of Ti<sub>3</sub>O<sub>5</sub> is 0.87 L g<sup>-1</sup> cm<sup>-1</sup>.

The photothermal conversion efficiency ( $\eta$ ) of the  $\gamma$ -Ti<sub>3</sub>O<sub>5</sub> HPMs was determined by equation (2) as the previous reports<sup>[31,42,43]</sup>. The temperature change of the  $\gamma$ -Ti<sub>3</sub>O<sub>5</sub> aqueous solution (1 mg mL<sup>-1</sup>) was recorded as a function of time under continuous irradiation of 808 nm NIR laser at a power of 1 W cm<sup>-2</sup>, in which the irradiation lasted for 600 s, and then the laser was shut off (figure 4e,f).

$$\eta = \frac{hS(T_{\max} - T_{\text{surr}}) - Q_{\text{Dis}}}{I(1 - 10^{-A_{808}})} \quad (2)$$

Following the previous reports, the value of hS can be calculated by equation (3) - (5). The T, T<sub>max</sub> and T<sub>surr</sub> are random temperature, the maximum temperature after irradiation and the surrounding temperature. In this work, we measured the temperature change at concentration of 1mg/mL, the T<sub>max</sub> - T<sub>surr</sub> = 45.3 °C, and the  $\tau_s$  was calculated to be 345.82 s by equation (3) and (4) as Figure 4 e and f. m and C<sub>p</sub> in equation (5) are the mass and heat capacity of solvent (water). In this work m=1 g, C<sub>p</sub> = 4.2 J g<sup>-1</sup> °C. The hS value was determined to be 11.93 mW / °C.

$$\theta = \frac{T - T_{\text{sur}}}{T_{\text{max}} - T_{\text{sur}}} \quad (3)$$

$$t = \tau s \ln \theta \quad (4)$$

$$hS = \frac{\sum_i m_i c_{p,i}}{\tau s} \quad (5)$$

Take the  $hS$  value into equation (2). At concentration of 1 mg/mL  $\gamma\text{-Ti}_3\text{O}_5$  HPMS,  $A_{808} = 0.865$ .  $Q_{\text{Dis}}$  expresses the heat dissipated due to light absorption by the pure water without  $\gamma\text{-Ti}_3\text{O}_5$ . It is measured to be 15.96 mW.  $I$  is the incident laser power (1000 mW). Substituting these values into equation (2), the 808 nm laser photothermal conversion efficiency ( $\eta$ ) of  $\gamma\text{-Ti}_3\text{O}_5$  HPMS can be calculated to be 65.29 %.

**Supporting Figures**

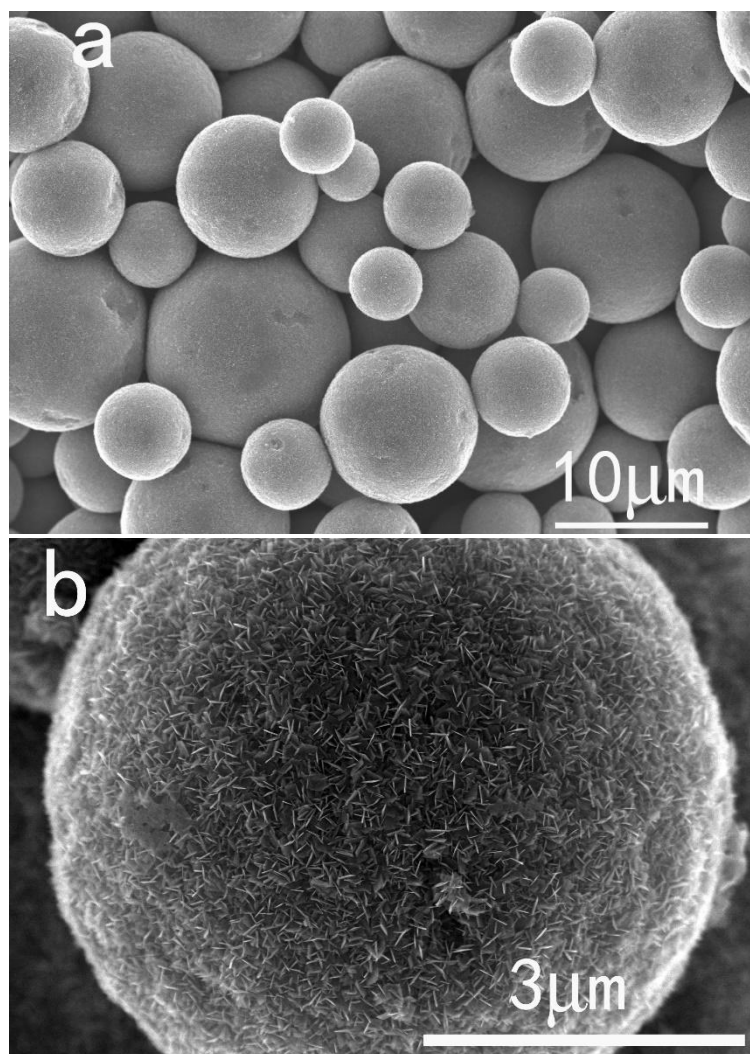

**Figure S1.** SEM images of the as-synthesized TiO<sub>2</sub> HPMs.

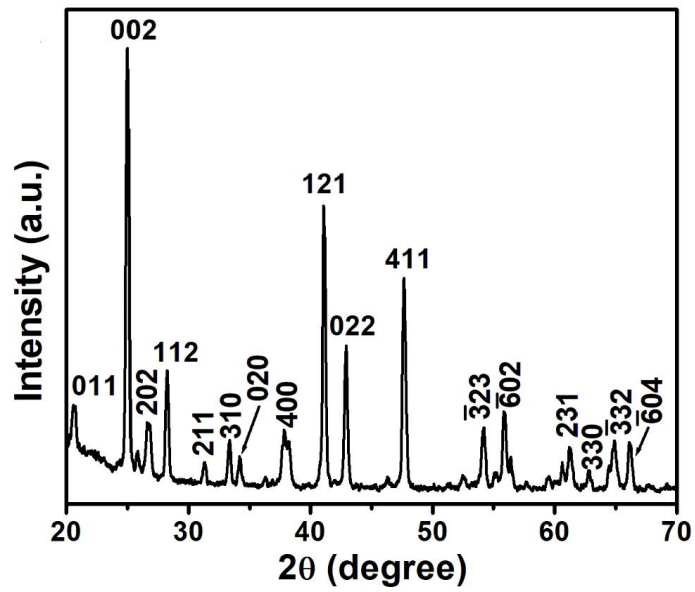

Figure S2. XRD pattern of the  $\gamma$ -Ti<sub>3</sub>O<sub>5</sub> HPMs.

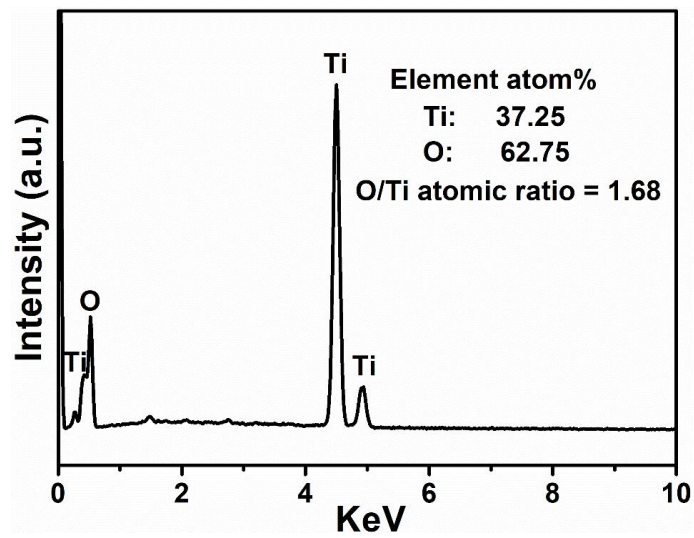

Figure S3. EDS spectrum of the  $\gamma$ -Ti<sub>3</sub>O<sub>5</sub> HPMs.

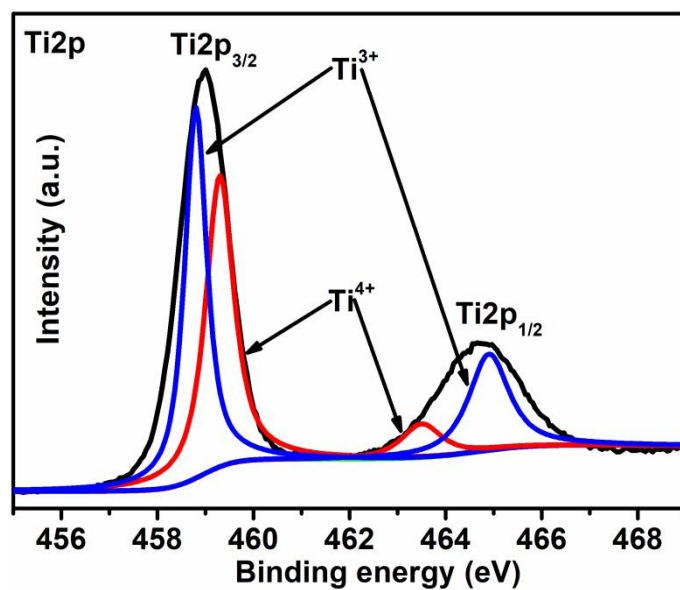

**Figure S4.** Ti2p XPS spectrum of the  $\gamma$ -Ti<sub>3</sub>O<sub>5</sub> nanosheet microspheres, which demonstrates that Ti<sup>4+</sup> and Ti<sup>3+</sup> ions coexist in the sample.

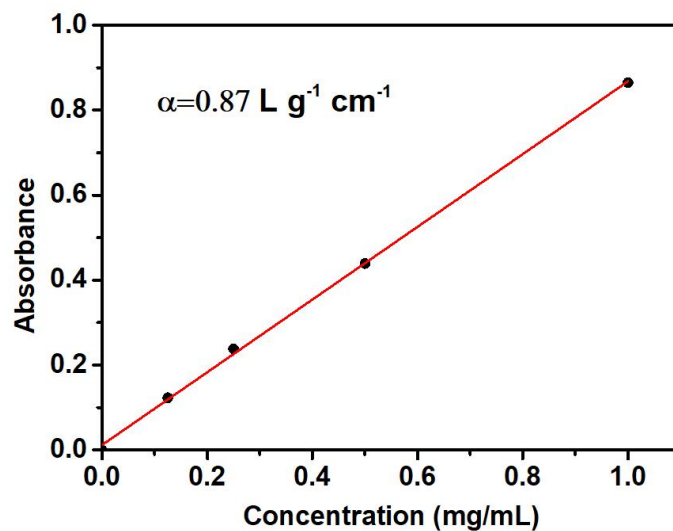

**Figure S5.** The linearly fitted plots of absorbance versus concentration of  $\gamma$ -Ti<sub>3</sub>O<sub>5</sub> aqueous suspension at 808 nm.

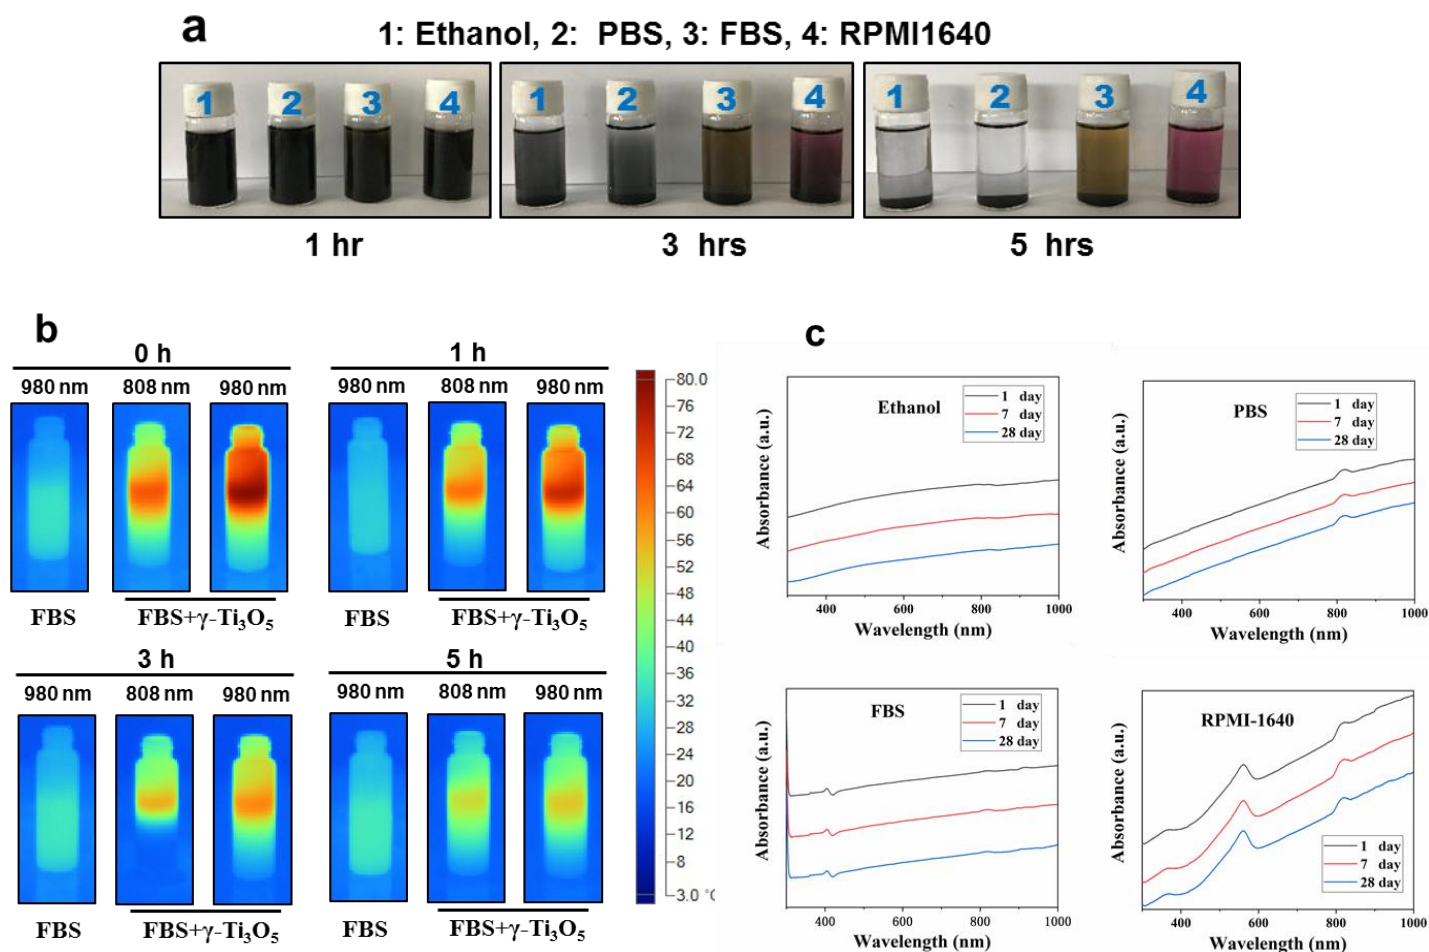

**Figure S6.** The stability of  $\gamma$ -Ti<sub>3</sub>O<sub>5</sub> HPMs in physiological medium PBS, FBS and RPMI1640. a. The aggregation and precipitation of  $\gamma$ -Ti<sub>3</sub>O<sub>5</sub> HPMs keep in room temperature for 1, 3 and 5 hours. b. Photothermal photographs of  $\gamma$ -Ti<sub>3</sub>O<sub>5</sub> HPMs dispersed in FBS for 1, 3 and 5 hours after 10 min laser irradiation at the wavelengths of 808 nm and 980nm (2 W cm<sup>-2</sup>), respectively. c. Absorption spectra of  $\gamma$ -Ti<sub>3</sub>O<sub>5</sub> HPMs (200  $\mu$ g mL<sup>-1</sup>) dispersed in ethanol, RPMI1640 and FBS for 1, 7 and 28 days.

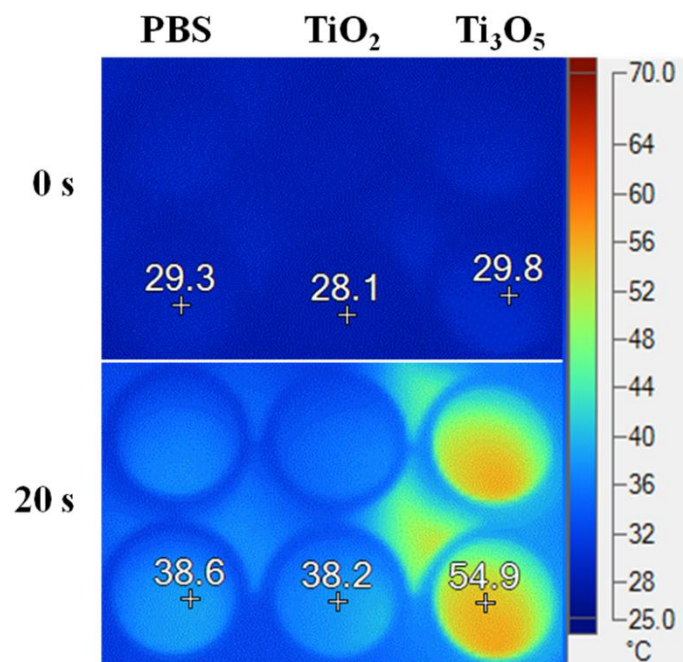

**Figure S7.** Infrared thermographic maps and temperature increase in wells of control and nanoparticles at different time points (Hela cells exposed to 808 nm laser at 2W).



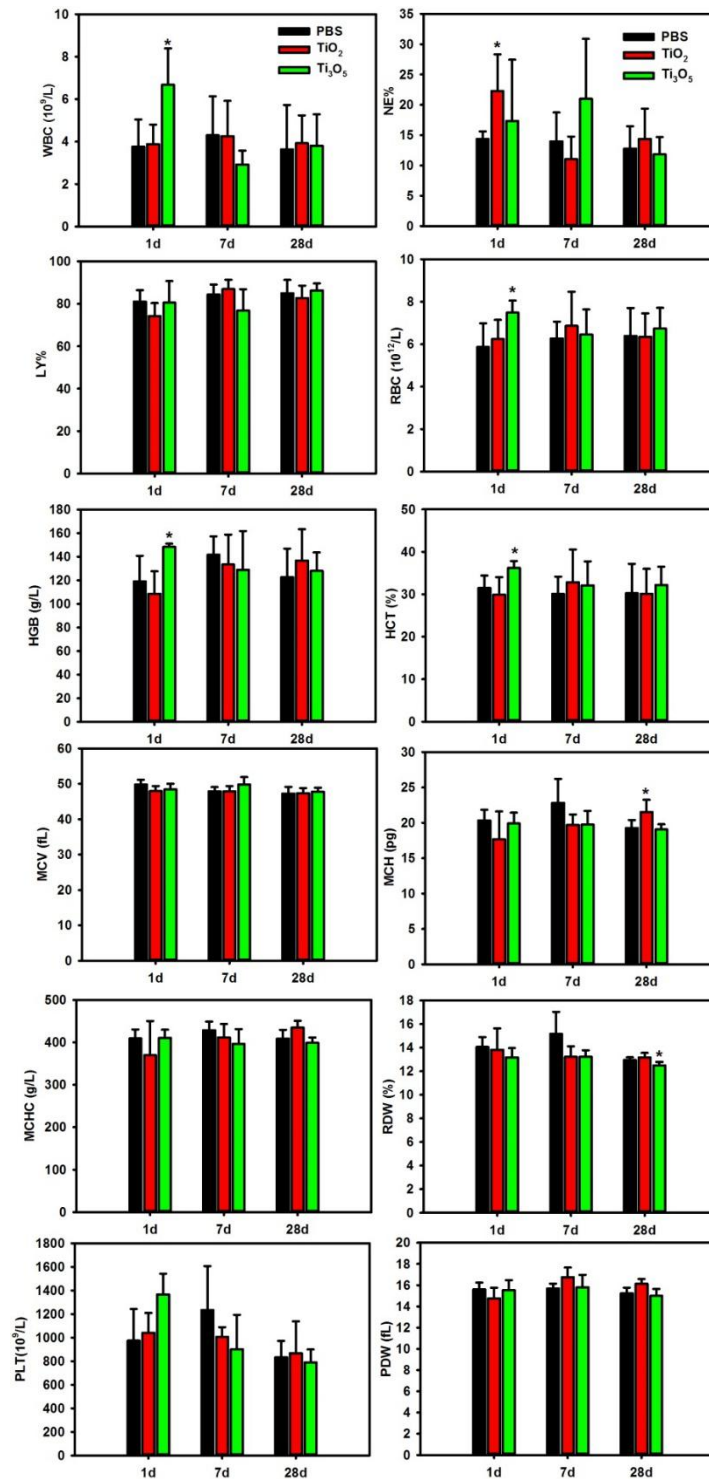

**Figure S8.** Haematological data of the mice intravenously injected with the  $\gamma$ -Ti<sub>3</sub>O<sub>5</sub> HPMS at 1, 7 and 28 days post-injection. The terms are following: white blood cells (WBC), neutrophils (NE), lymphocyte (LY), red blood cells (RBC), haemoglobin (HGB), haematocrit (HCT), mean corpuscular volume (MCV), mean corpuscular haemoglobin (MCH), mean corpuscular haemoglobin concentration (MCHC), red blood cell volume distribution width (RDW), platelets (PLT) and platelet distribution width (PDW).

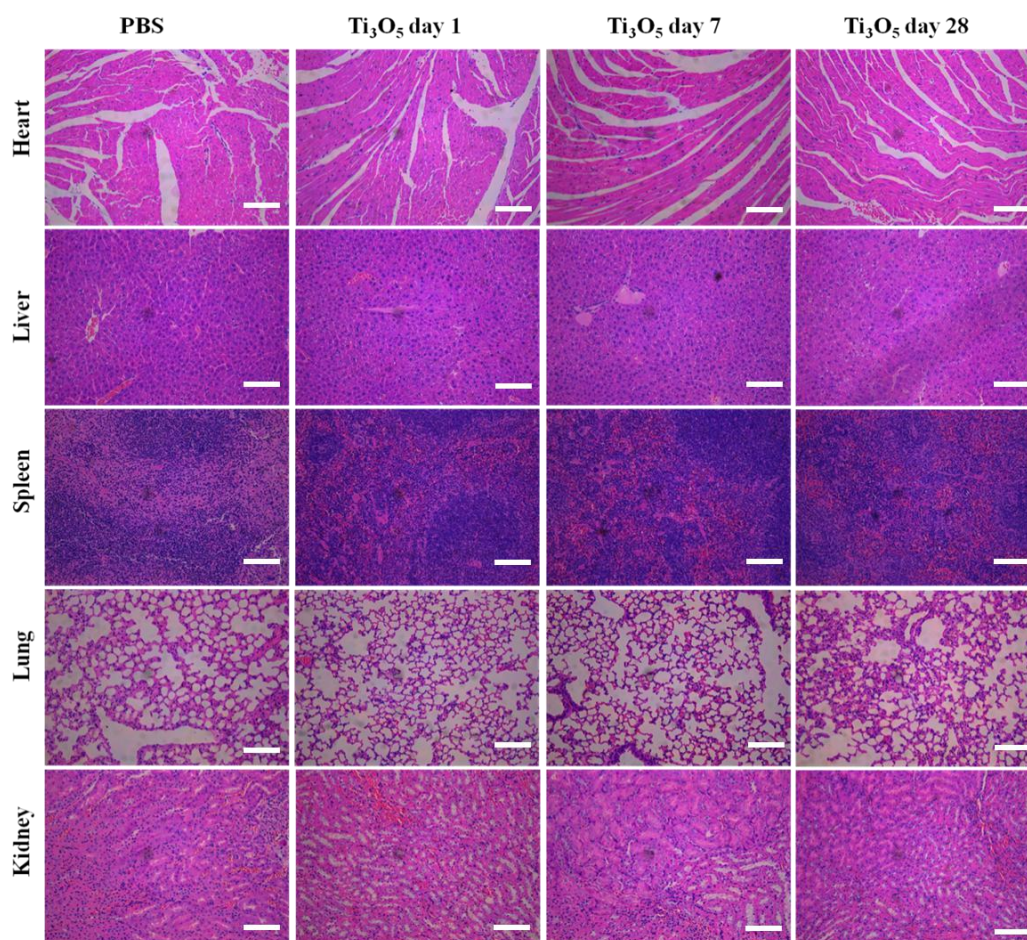

**Figure S9.** Histological data (haematoxylin and eosin stained images) obtained from the liver, spleen, kidney, heart and lung of the  $\gamma\text{-Ti}_3\text{O}_5$  HPM-treated mice at 1, 7 and 28 days post tail vein injection. Scale bar, 100  $\mu\text{m}$ .
